# Supplementary material for: Mineralogical, Geochemical and Geotechnical Study of BCV 2017 Bentonite—The Initial State and the State following Thermal Treatment at 200 °C
Source: MDPI journal article supplement (doi:10.3390/min11080871), 2021-08-12
Supplement: s1 [file s1]

ČVUT Fakulta stavební - Centrum experimentální geotechniky  
Stanovení Swell indexu - postup dle D5890-11

zk. OL182/24

Zkoušku provedl: K. Černochová

Datum: 14.6.21

Záznam č.

**SI016**

Číslo materiálu:

179

Projekt/

IB200

Zakázka č.

Popis vzorku: BCV\_2017, nezatížený

Příprava vzorku:

nezatížený, skladováno v uzavřené nádobě

Pomůcky:

Skleněný odměrný válec 100 ml; váhy s přesností 0.01 g (N-5462); stopky (N41); před zahájení zkoušky je odebrán vzorek pro stanovení vlhkosti dle ČSN EN ISO/17892-1

**Stanovení vlhkosti dle ČSN EN ISO/17892-1 (od 1.5.2015)**

Pomůcky:

sušárna s teploměrem a termostatem zaručujícím udržení požadované teploty 105-110 °C (Z2), váhy (N-5462)

**Stanovení vlhkosti:**

Označení váženky

9

Hmotnost vysoušecí nádoby [g] - m<sub>1</sub>

2,26

Hmotnost vysoušecí nádoby s vlhkou zeminou [g] - m<sub>2</sub>

19,82

Hmotnost vysoušecí nádoby s vysušenou zeminou [g] - m<sub>3</sub>

17,86

$$w = \frac{(m_2 - m_3)}{(m_3 - m_1)} * 100$$

průměr

**Vlhkost [%]**

12,6%

| zkouška č. | označení válce | hmotnost vlhkého vzorku | Objem suspenze po 24h | Objem suspenze po 24+24h | Objem suspenze po 7 dnech | Objem suspenze po 10 dnech | vlhkost | hmotnost vysušeného vzorku | Swell index 24h | Swell index 24+24h | Swell index 7 dní | Swell index 10 dní |
|------------|----------------|-------------------------|-----------------------|--------------------------|---------------------------|----------------------------|---------|----------------------------|-----------------|--------------------|-------------------|--------------------|
|            | č.             | m [g]                   | Vsusp24 [ml]          | Vsusp24+24 [ml]          | Vsusp7 dní [ml]           | Vsusp 10 dní [ml]          | w [%]   | md [g]                     | SI 24 [ml/2g]   | SI 24+24 [ml/2g]   | SI 7 dní [ml/2g]  | SI 10 dní [ml/2g]  |
| 1          | MO305          | 2,48                    | 8                     | 8,7                      | 9,5                       | 9,8                        | 12,6%   | 2,20                       | 7,3             | 7,9                | 8,6               | 8,9                |
| 2          | MO313          | 2,38                    | 8                     | 9                        | 9,5                       | 9,5                        | 12,6%   | 2,11                       | 7,6             | 8,5                | 9,0               | 9,0                |
| 3          | MO301          | 2,43                    | 10                    | 10,5                     | 11                        | 11                         | 12,6%   | 2,16                       | 9,3             | 9,7                | 10,2              | 10,2               |
| 4          | MO315          | 2,19                    | 8                     | 8,7                      | 9                         | 9                          | 12,6%   | 1,95                       | 8,2             | 8,9                | 9,3               | 9,3                |
| 5          | MO306          | 2,39                    | 9,5                   | 9,5                      | 10                        | 10,2                       | 12,6%   | 2,12                       | 8,9             | 8,9                | 9,4               | 9,6                |

$$m_d = \frac{m}{1 + w}$$

Swell index = 

|     |        |       |        |
|-----|--------|-------|--------|
| 24h | 24+24h | 7 dní | 10 dní |
| 8,3 | 8,8    | 9,3   | 9,4    |

 ml/2g

Poznámky:
