# Supplementary material for: Mineralogical, Geochemical and Geotechnical Study of BCV 2017 Bentonite—The Initial State and the State following Thermal Treatment at 200 °C
Source: MDPI journal article supplement (doi:10.3390/min11080871), 2021-08-12
Supplement: s1 [file s1]

**ČVUT Fakulta stavební - Centrum experimentální geotechniky**  
**Stanovení Swell indexu - postup dle D5890-11**

zk. OL182/24

Zkoušku provedl: **K. Černochová**

Datum: 7.12.20

Záznam č. **SI012**

Číslo materiálu:

179

Projekt/

Zakázka č.

IB200

Popis vzorku: BCV\_2017, zatížený

Příprava vzorku: 27 měsíců v peci na 200°C

Pomůcky: Skleněný odměrný válec 100 ml; váhy s přesností 0.01 g (N-5462); stopky (N41); před zahájení zkoušky je odebrán vzorek pro stanovení vlhkosti dle ČSN EN ISO/17892-1

**Stanovení vlhkosti dle ČSN EN ISO/17892-1 (od 1.5.2015)**

Pomůcky: sušárna s teploměrem a termostatem zaručujícím udržení požadované teploty 105-110 °C (Z2), váhy (N-5462)

**Stanovení vlhkosti:**

Označení váženky

11

Hmotnost vysoušecí nádoby [g] - m1

2,3

Hmotnost vysoušecí nádoby s vlhkou zeminou [g] - m2

34,01

Hmotnost vysoušecí nádoby s vysušenou zeminou [g] - m3

33,98

**Vlhkost [%]**

0,1%

$$w = \frac{(m_2 - m_3)}{(m_3 - m_1)} * 100$$

průměr

| zkouška č. | označení válce<br>č. | hmotnost vlhkého vzorku<br>m [g] | Objem suspenze po 24h<br>Vsusp24 [ml] | Objem suspenze po 24+24h<br>Vsusp24+24 [ml] | vlhkost<br>w [%] | hmotnost vysušeného vzorku<br>md [g] | Swell index 24h<br>SI 24 [ml/2g] | Swell index 24+24h<br>SI 24+24 [ml/2g] | poznámka |
|------------|----------------------|----------------------------------|---------------------------------------|---------------------------------------------|------------------|--------------------------------------|----------------------------------|----------------------------------------|----------|
| 1          | MO313                | 2,16                             | 6                                     |                                             | 0,1%             | 2,16                                 | 5,6                              |                                        |          |
| 2          | MO311                | 2,01                             | 5,8                                   |                                             | 0,1%             | 2,01                                 | 5,8                              |                                        |          |
| 3          | MO303                | 2,02                             | 5,8                                   |                                             | 0,1%             | 2,02                                 | 5,7                              |                                        |          |
| 4          |                      |                                  |                                       |                                             |                  |                                      |                                  |                                        |          |
| 5          |                      |                                  |                                       |                                             |                  |                                      |                                  |                                        |          |

$$m_d = \frac{m}{1 + w}$$

Swell index =  $\frac{24h}{24+24h}$  **5,7** ml/2g

Poznámky:
