# Supplementary material for: Mineralogical, Geochemical and Geotechnical Study of BCV 2017 Bentonite—The Initial State and the State following Thermal Treatment at 200 °C
Source: MDPI journal article supplement (doi:10.3390/min11080871), 2021-08-12
Supplement: s1 [file s1]

**ČVUT Fakulta stavební - Centrum experimentální geotechniky**  
**Stanovení Swell indexu - postup dle D5890-11**

zk. OL182/24

Zkoušku provedl: **K. Černochová**

Datum: 7.12.20

Záznam č. **SI014**

Číslo materiálu:

179

Projekt/

Zakázka č.

IB200

Popis vzorku: BCV 2017, zatížený, vrchní krusta po vyndání z pece

Příprava vzorku: 27 měsíců v peci na 200°C

Pomůcky: Skleněný odměrný válec 100 ml; váhy s přesností 0.01 g (N-5462); stopky (N41); před zahájení zkoušky je odebrán vzorek pro stanovení vlhkosti dle ČSN EN ISO/17892-1

**Stanovení vlhkosti dle ČSN EN ISO/17892-1 (od 1.5.2015)**

Pomůcky: sušárna s teploměrem a termostatem zaručujícím udržení požadované teploty 105-110 °C (Z2), váhy (N-5462)

**Stanovení vlhkosti:**

Označení váženky

Hmotnost vysoušecí nádoby [g] - m1

Hmotnost vysoušecí nádoby s vlhkou zeminou [g] - m2

Hmotnost vysoušecí nádoby s vysušenou zeminou [g] - m3

$$w = \frac{(m_2 - m_3)}{(m_3 - m_1)} * 100$$

průměr

**Vlhkost [%]**

0,0%

| zkouška č. | označení válce č. | hmotnost vlhkého vzorku m [g] | Objem suspenze po 24h Vsusp24 [ml] | Objem suspenze po 24+24h Vsusp24+24 [ml] | vlhkost w [%] | hmotnost vysušeného vzorku md [g] | Swell index 24h SI 24 [ml/2g] | Swell index 24+24h SI 24+24 [ml/2g] | poznámka       |
|------------|-------------------|-------------------------------|------------------------------------|------------------------------------------|---------------|-----------------------------------|-------------------------------|-------------------------------------|----------------|
| 1          | MO304             | 0,8                           | 2,33                               |                                          | 0,0%          | 0,80                              | 5,8                           |                                     | málo materiálu |
| 2          |                   |                               |                                    |                                          |               |                                   |                               |                                     |                |
| 3          |                   |                               |                                    |                                          |               |                                   |                               |                                     |                |
| 4          |                   |                               |                                    |                                          |               |                                   |                               |                                     |                |
| 5          |                   |                               |                                    |                                          |               |                                   |                               |                                     |                |

$$m_d = \frac{m}{1 + w}$$

**Swell index =** **24h**  
**5,8** **24+24h**  
**ml/2g**

Poznámky: není možné odebrat dostatečné množství vzorku, zkouška provedena s dostupným množstvím
