# Supplementary material for: Mineralogical, Geochemical and Geotechnical Study of BCV 2017 Bentonite—The Initial State and the State following Thermal Treatment at 200 °C
Source: MDPI journal article supplement (doi:10.3390/min11080871), 2021-08-12
Supplement: s1 [file s1]

Zkoušku provedl: **Danuše Nádherná**

Datum: **30.04.2021**

Záznam č.

**wL097**

Č. materiálu + popis vzorku: č. 179, bentonit sypký z pece 200C

Projekt/Zakázka č.

IB200C

Příprava vzorku:

vzorek byl připraven 10dnů před zkouškou, odběr z pece 8.4.2021

Pomůcky:

stěrka, stříčka, odpařovací miska, váhy (N-5462), stopky (N41), hmoždíř s tloučkem, plochá míchací deska, kuželový přístroj (Z9411), míchací nádoby, pravítko, sušárna s teploměrem a termostatem zaručujícím udržení požadované teploty 105-110 °C (Z2), vysoušecí nádoba zaručující vzduchotěsné uzavření zeminy, exsikátor s vysoušedlem (např. silikagelem)

### Mez tekutosti:

| kužel: 80g/30°                                          | nulové čtení: 0,0 mm |       |       |       |       |
|---------------------------------------------------------|----------------------|-------|-------|-------|-------|
| označení váženky                                        | 11                   | 4     | 15    | 7     | 2     |
| 1. penetrace [mm]                                       | 15,5                 | 17,9  | 19,1  | 21,8  | 22    |
| 2. penetrace [mm]                                       | 15,5                 | 17,8  | 19,3  | 21,3  | 22    |
| Průměrná penetrace [mm]                                 | 15,5                 | 17,85 | 19,2  | 21,55 | 22    |
| Hmotnost misky [g]                                      | 2,27                 | 2,27  | 2,25  | 2,24  | 2,28  |
| Hmotnost před sušením <small>(miska+vzorek)</small> [g] | 19,37                | 32,26 | 35,99 | 29,27 | 26,89 |
| Hmotnost po sušení <small>(miska + vzorek)</small> [g]  | 10,45                | 16,42 | 17,78 | 14,55 | 13,32 |
| Vlhkost [%]                                             | 109%                 | 112%  | 117%  | 120%  | 123%  |

|                 |      |       |      |       |      |
|-----------------|------|-------|------|-------|------|
| p (penetrace) = | 15,5 | 17,85 | 19,2 | 21,55 | 22   |
| w =             | 109% | 112%  | 117% | 120%  | 123% |
| w lintrend =    | 109% | 113%  | 116% | 121%  | 122% |

$$w_{\text{lintrend}} = a p + b$$

$$a = 2\%$$

$$b = 77\%$$

|                                         |      |      |      |      |      |        |
|-----------------------------------------|------|------|------|------|------|--------|
| relat. rozdíl $w - w_{\text{lintrend}}$ | 0,5% | 1,2% | 1,0% | 1,1% | 0,9% | max 5% |
|-----------------------------------------|------|------|------|------|------|--------|

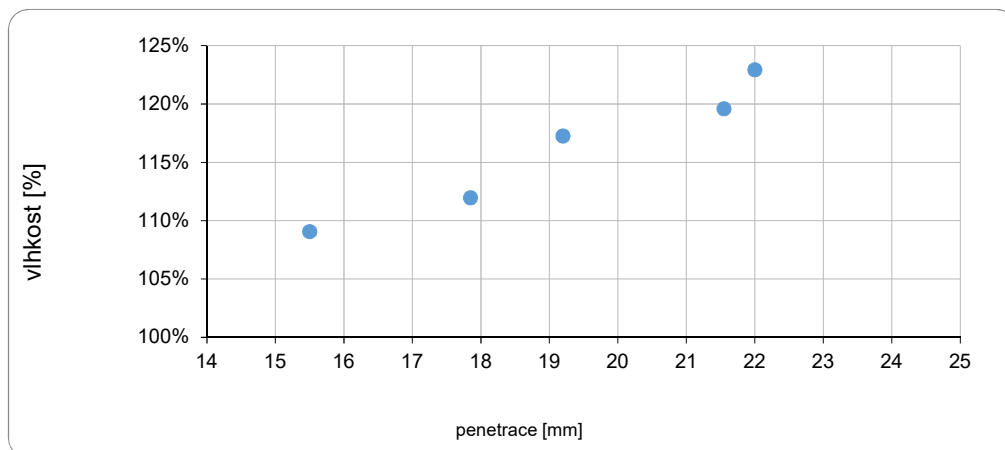

Mez tekutosti při penetraci

20 mm

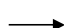

$w_l = 118\%$

Poznámky: připraveno na penetraci 14 mm, po 10ti dnech byl vzorek tuhý, penetrace cca 12mm dosaženo po přidání velkého množství vody (neměřeno), penetrace 15,5 dosaženo po přidání dalšího velkého množství vody (opět neměřeno) Vzorek by během 10ti dnů přijal mnohem větší množství vody, které by nebylo nutné přidávat před zkouškou  
Podpis:
