# Supplementary material for: Mineralogical, Geochemical and Geotechnical Study of BCV 2017 Bentonite—The Initial State and the State following Thermal Treatment at 200 °C
Source: MDPI journal article supplement (doi:10.3390/min11080871), 2021-08-12
Supplement: s1 [file s1]

Zkoušku provedl: K. Černochová

Datum: 7.12.20

Záznam č. SI013

Číslo materiálu: 179

Projekt/ Zakázka č. IB200

Popis vzorku: BCV 2017, surový, nezatížený

Příprava vzorku: nezatížený

Pomůcky: Skleněný odměrný válec 100 ml; váhy s přesností 0.01 g (N-5462); stopky (N41); před zahájení zkoušky je odebrán vzorek pro stanovení vlhkosti dle ČSN EN ISO/17892-1

Stanovení vlhkosti dle ČSN EN ISO/17892-1 (od 1.5.2015)

Pomůcky: sušárna s teploměrem a termostatem zaručujícím udržení požadované teploty 105-110 °C (Z2), váhy (N-5462)

Stanovení vlhkosti:

|                                                        |       |  |  |        |
|--------------------------------------------------------|-------|--|--|--------|
| Označení váženky                                       | 8     |  |  |        |
| Hmotnost vysoušecí nádoby [g] - m1                     | 2,26  |  |  |        |
| Hmotnost vysoušecí nádoby s vlhkou zeminou [g] - m2    | 35,81 |  |  |        |
| Hmotnost vysoušecí nádoby s vysušenou zeminou [g] - m3 | 32,05 |  |  |        |
| Vlhkost [%]                                            | 12,6% |  |  | průměr |

$$w = \frac{(m_2 - m_3)}{(m_3 - m_1)} * 100$$

| zkouška č. | označení válce | hmotnost vlhkého vzorku | Objem suspenze po 24h | Objem suspenze po 24+24h | vlhkost | hmotnost vysušeného vzorku | Swell index 24h | Swell index 24+24h | poznámka |
|------------|----------------|-------------------------|-----------------------|--------------------------|---------|----------------------------|-----------------|--------------------|----------|
|            | č.             | m [g]                   | Vsusp24 [ml]          | Vsusp24+24 [ml]          | w [%]   | md [g]                     | SI 24 [ml/2g]   | SI 24+24 [ml/2g]   |          |
| 1          | MO314          | 2,31                    | 7,3                   |                          | 12,6%   | 2,05                       | 7,1             |                    |          |
| 2          | MO333          | 2,4                     | 8                     |                          | 12,6%   | 2,13                       | 7,5             |                    |          |
| 3          | MO312          | 2,14                    | 7,7                   |                          | 12,6%   | 1,90                       | 8,1             |                    |          |
| 4          | MO334          | 2,24                    | 7,1                   |                          | 12,6%   | 1,99                       | 7,1             |                    |          |
| 5          |                |                         |                       |                          |         |                            |                 |                    |          |

$$m_d = \frac{m}{1 + w}$$

Swell index =

24h

24+24h

7,5

ml/2g
