# Supplementary material for: Mineralogical, Geochemical and Geotechnical Study of BCV 2017 Bentonite—The Initial State and the State following Thermal Treatment at 200 °C
Source: MDPI journal article supplement (doi:10.3390/min11080871), 2021-08-12
Supplement: s1 [file s1]

ČVUT Fakulta stavební - Centrum experimentální geotechniky  
Stanovení Swell indexu - postup dle D5890-11

zk. OL182/24

Zkoušku provedl: K. Černochová

Datum: 14.6.21

Záznam č.

SI015

Číslo materiálu:

179

Projekt/

IB200

Zakázka č.

Popis vzorku: BCV\_2017, 15 měs 200°C

Příprava vzorku: 15més v peci 200°C. po odběru uzavřen do pytlíku

Pomůcky: Skleněný odměrný válec 100 ml; váhy s přesností 0.01 g (N-5462); stopky (N41); před zahájení zkoušky je odebrán vzorek pro stanovení vlhkosti dle ČSN EN ISO/17892-1

Stanovení vlhkosti dle ČSN EN ISO/17892-1 (od 1.5.2015)

Pomůcky: sušárna s teploměrem a termostatem zaručujícím udržení požadované teploty 105-110 °C (Z2), váhy (N-5462)

Stanovení vlhkosti:

Označení váženky

8

Hmotnost vysoušecí nádoby [g] - m1

2,27

Hmotnost vysoušecí nádoby s vlhkou zeminou [g] - m2

18,19

Hmotnost vysoušecí nádoby s vysušenou zeminou [g] - m3

17,7

$$w = \frac{(m_2 - m_1)}{(m_3 - m_1)} * 100$$

průměr

Vlhkost [%]

3,2%

| zkouška č. | označení válce | hmotnost vlhkého vzorku | Objem suspenze po 24h | Objem suspenze po 24+24h | Objem suspenze po 7 dnech | Objem suspenze po 10 dnech | vlhkost | hmotnost vysušeného vzorku | Swell index 24h | Swell index 24+24h | Swell index 7 dní | Swell index 10 dní |
|------------|----------------|-------------------------|-----------------------|--------------------------|---------------------------|----------------------------|---------|----------------------------|-----------------|--------------------|-------------------|--------------------|
|            | č.             | m [g]                   | Vsusp24 [ml]          | Vsusp24+24 [ml]          | Vsusp7 dní [ml]           | Vsusp 10 dní [ml]          | w [%]   | md [g]                     | SI 24 [ml/2g]   | SI 24+24 [ml/2g]   | SI 7 dní [ml/2g]  | SI 10 dní [ml/2g]  |
| 1          | MO304          | 2,76                    | 7,8                   | 7,8                      | 8                         | 9                          | 3,2%    | 2,68                       | 5,8             | 5,8                | 6,0               | 6,7                |
| 2          | MO307          | 2,5                     | 6,5                   | 6,5                      | 6,5                       | 8                          | 3,2%    | 2,42                       | 5,4             | 5,4                | 5,4               | 6,6                |
| 3          | MO311          | 2,61                    | 7,5                   | 7,5                      | 7,5                       | 8,5                        | 3,2%    | 2,53                       | 5,9             | 5,9                | 5,9               | 6,7                |
| 4          | MO312          | 2,47                    | 6                     | 6                        | 6                         | 7                          | 3,2%    | 2,39                       | 5,0             | 5,0                | 5,0               | 5,8                |
| 5          | MO314          | 2,59                    | 7                     | 7                        | 7                         | 8                          | 3,2%    | 2,51                       | 5,6             | 5,6                | 5,6               | 6,4                |

$$m_d = \frac{m}{1 + w}$$

Swell index = 

|     |        |       |        |
|-----|--------|-------|--------|
| 24h | 24+24h | 7 dní | 10 dní |
| 5,5 | 5,5    | 5,6   | 6,5    |

 ml/2g

Poznámky:
