# Supplementary material for: Mineralogical, Geochemical and Geotechnical Study of BCV 2017 Bentonite—The Initial State and the State following Thermal Treatment at 200 °C
Source: MDPI journal article supplement (doi:10.3390/min11080871), 2021-08-12
Supplement: s1 [file s1]

Zkoušku provedl: **Danuše Nádherná**

Datum: **20.04.2021**

Záznam č.

**wL130**

Č. materiálu + popis vzorku: č. 179, bentonit sypký z pece 200C

Projekt/Zakázka č.

IB200C

Příprava vzorku:

vzorek byl připraven 24 hodin před zkouškou, odběr z pece 8.4.2021

Pomůcky:

stěrka, stříčka, odpařovací miska, váhy (N-5462), stopky (N41), hmoždíř s tloučkem, plochá míchací deska, kuželový přístroj (Z9411), míchací nádoby, pravítko, sušárna s teploměrem a termostatem zaručujícím udržení požadované teploty 105-110 °C (Z2), vysoušecí nádoba zaručující vzduchotěsné uzavření zeminy, exsikátor s vysoušedlem (např. silikagelem)

### Mez tekutosti:

| kužel: 80g/30°                           | nulové čtení: 0,0 mm |       |      |       |       |
|------------------------------------------|----------------------|-------|------|-------|-------|
| označení váženky                         | 7                    | 2     | 15   | 4     | 11    |
| 1. penetrace [mm]                        | 15,2                 | 17,4  | 18,1 | 19,8  | 22,8  |
| 2. penetrace [mm]                        | 14,9                 | 17    | 18,1 | 19,8  | 22,6  |
| Průměrná penetrace [mm]                  | 15,05                | 17,2  | 18,1 | 19,8  | 22,7  |
| Hmotnost misky [g]                       | 2,24                 | 2,28  | 2,25 | 2,27  | 2,28  |
| Hmotnost před sušením (miska+vzorek) [g] | 17,82                | 18,5  | 18   | 17,29 | 17,49 |
| Hmotnost po sušení (miska + vzorek) [g]  | 10,05                | 10,23 | 9,87 | 9,43  | 9,27  |
| Vlhkost [%]                              | 99%                  | 104%  | 107% | 110%  | 118%  |

p (penetrace) = 15,05 17,2 18,1 19,8 22,7

w = 99% 104% 107% 110% 118%

w lintrend = 99% 104% 106% 110% 117%

$w_{\text{lintrend}} = ap + b$

a = 2%

b = 64%

|                                         |      |      |      |      |      |        |
|-----------------------------------------|------|------|------|------|------|--------|
| relat. rozdíl w - $w_{\text{lintrend}}$ | 0,3% | 0,3% | 0,3% | 0,6% | 0,3% | max 5% |
|-----------------------------------------|------|------|------|------|------|--------|

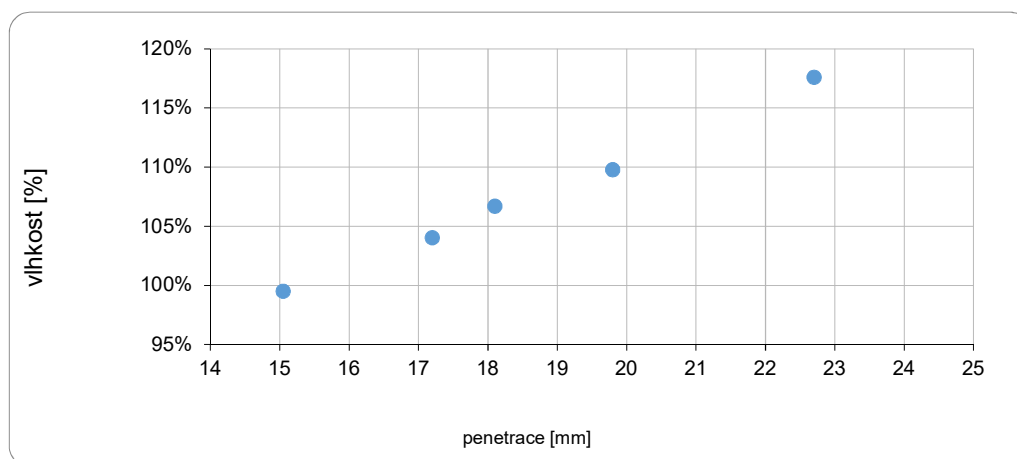

Mez tekutosti při penetraci

20 mm

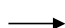

$w_l = 111\%$

Poznámky:
